# Supplementary material for: Antiferromagnetism in GaS monolayer doped with TM–TM atom pairs (TM = V, Cr, Mn, and Fe)
Source: Royal Society of Chemistry journal article supplement (doi:10.1039/d4cp01119h), 2024-01-01
Supplement: d4cp01119h1.pdf [file d4cp01119h1.pdf]

## Antiferromagnetism in GaS monolayer doped with TM-TM pair (TM = V, Cr, Mn, and Fe)

D. M. Hoat,<sup>1,2,\*</sup> Nguyen Thanh Tien<sup>3</sup>, Duy Khanh Nguyen,<sup>4,5</sup> and J. Guerrero-Sanchez<sup>6</sup>

<sup>1</sup>Institute of Theoretical and Applied Research, Duy Tan University, Ha Noi 100000, Viet Nam

<sup>2</sup>Faculty of Natural Sciences, Duy Tan University, Da Nang 550000, Viet Nam

<sup>3</sup>College of Natural Sciences, Can Tho University, 3-2 Road, Can Tho City 900000, Vietnam

<sup>4</sup>Laboratory for Computational Physics, Institute for Computational Science and Artificial Intelligence, Van Lang University, Ho Chi Minh City, Vietnam

<sup>5</sup>Faculty of Mechanical - Electrical and Computer Engineering, School of Technology, Van Lang University, Ho Chi Minh City, Vietnam

<sup>6</sup>Universidad Nacional Autónoma de México, Centro de Nanociencias y Nanotecnología, Apartado Postal 14, Ensenada, Baja California, Código Postal 22800, México

\*Corresponding autor: [dominhhoat@duytan.edu.vn](mailto:dominhhoat@duytan.edu.vn)

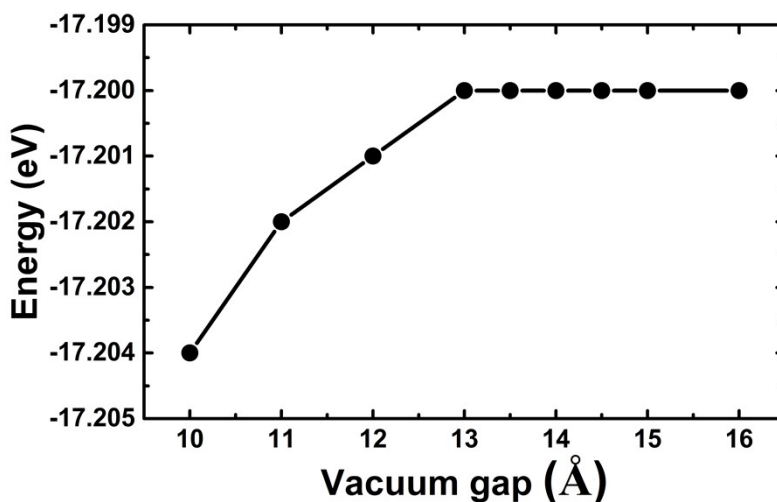

Figure S1: Vacuum-dependent variation of energy of GaS monolayer.

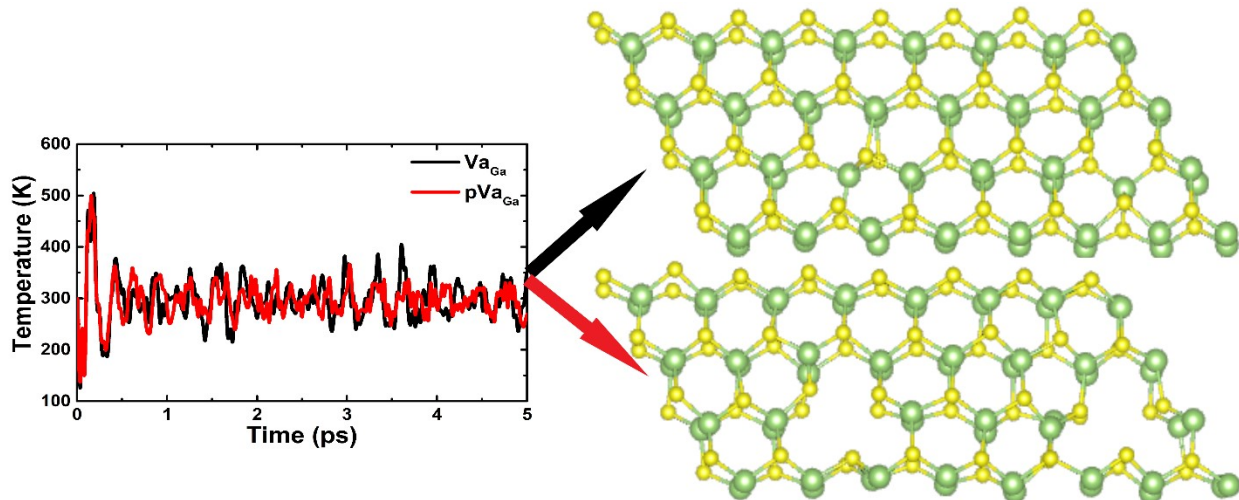

Figure 2: AIMD simulations at 300 K (Variation of temperature + Atomic structure after 5 ps of simulations) of  $V_{Ga}$  and  $pV_{Ga}$  systems.

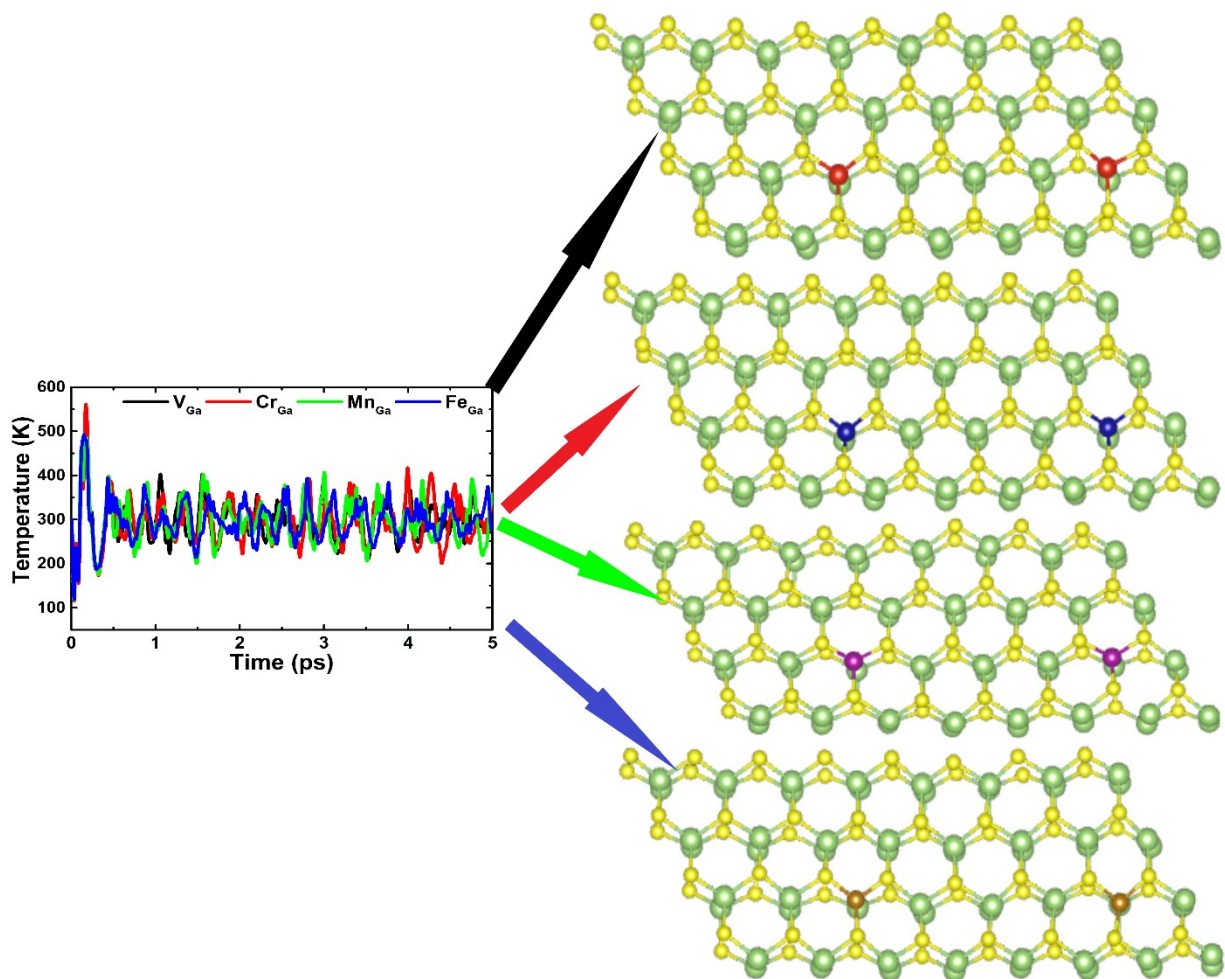

Figure 3: AIMD simulations at 300 K (Variation of temperature + Atomic structure after 5 ps of simulations) of  $V_{Ga}$ ,  $Cr_{Ga}$ ,  $Mn_{Ga}$ , and  $Fe_{Ga}$  systems.

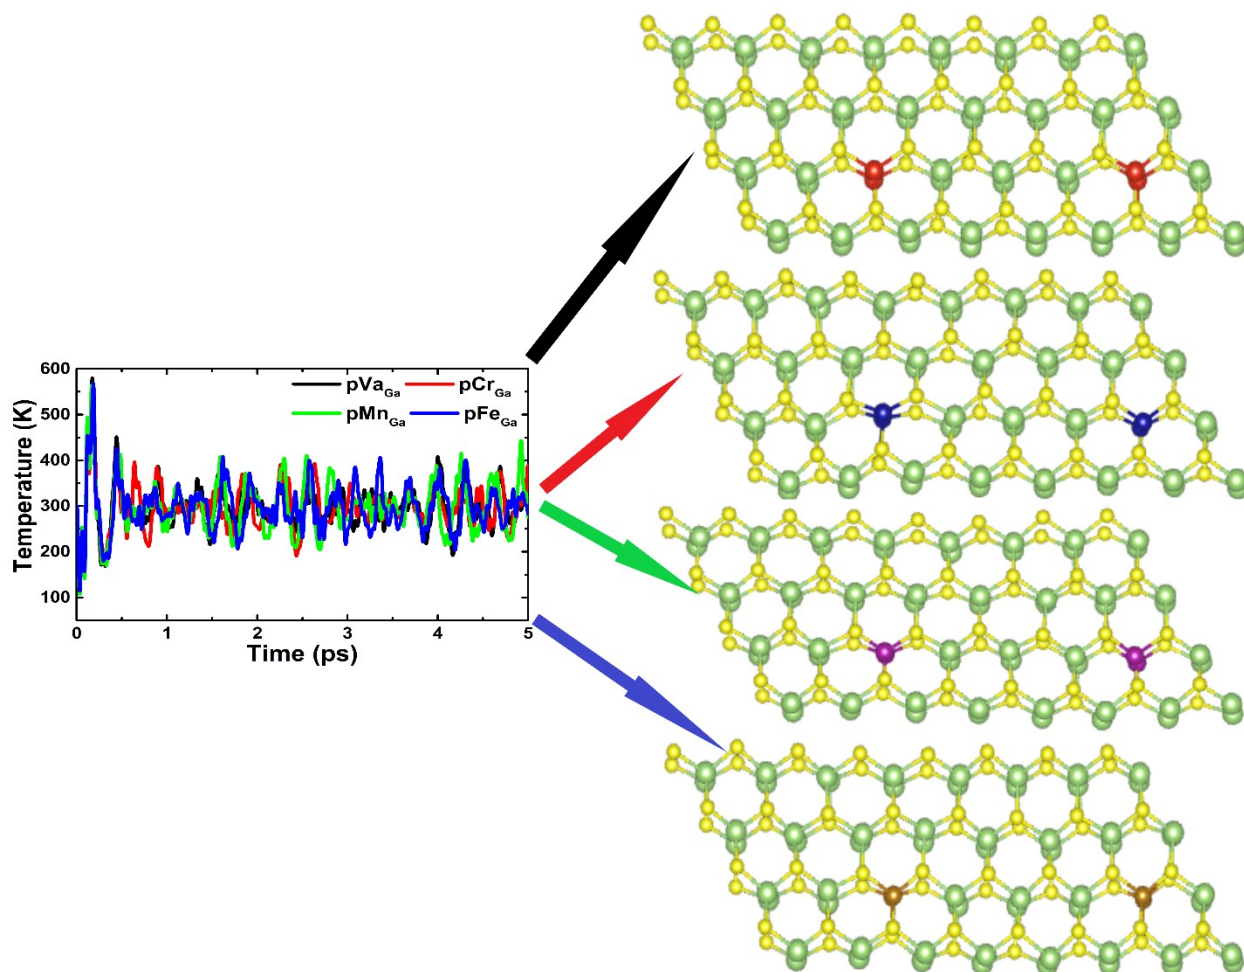

Figure 4: AIMD simulations at 300 K (Variation of temperature + Atomic structure after 5 ps of simulations) of pV<sub>Ga</sub>, pCr<sub>Ga</sub>, pMn<sub>Ga</sub>, and pFe<sub>Ga</sub> systems.

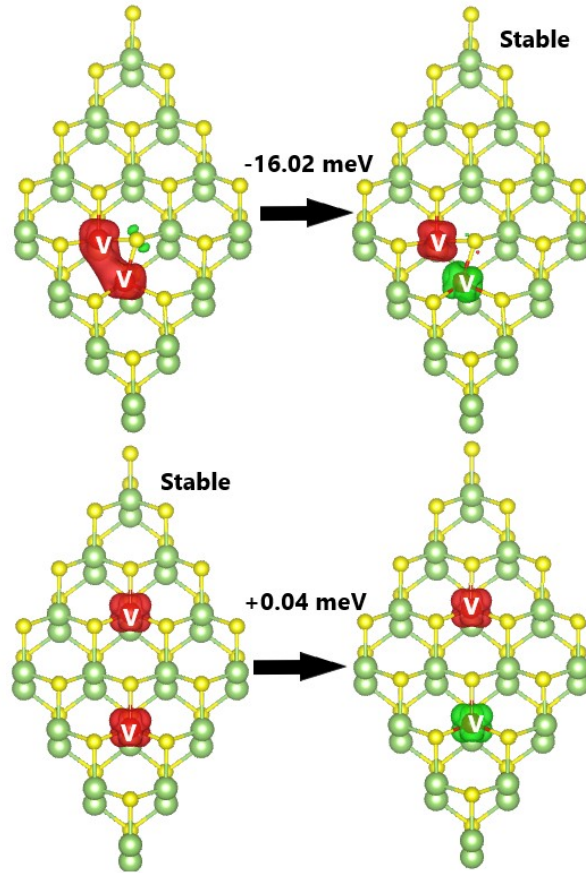

Figure S5: Spin density (Iso-surface value:  $0.01 \text{ e}/\text{\AA}^3$ ; Red surface: Spin-up; Green surface: Spin-down) in GaS monolayer in-plane-doped with V atoms with different interatomic distances.

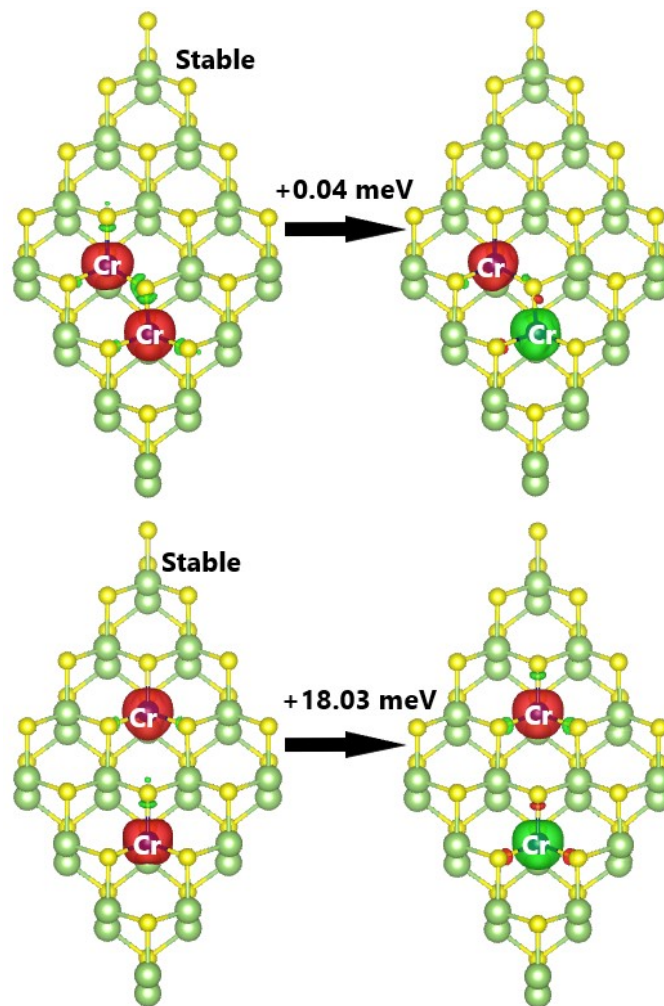

Figure S6: Spin density (Iso-surface value:  $0.01 \text{ e}/\text{\AA}^3$ ; Red surface: Spin-up; Green surface: Spin-down) in GaS monolayer in-plane-doped with Cr atoms with different interatomic distances.



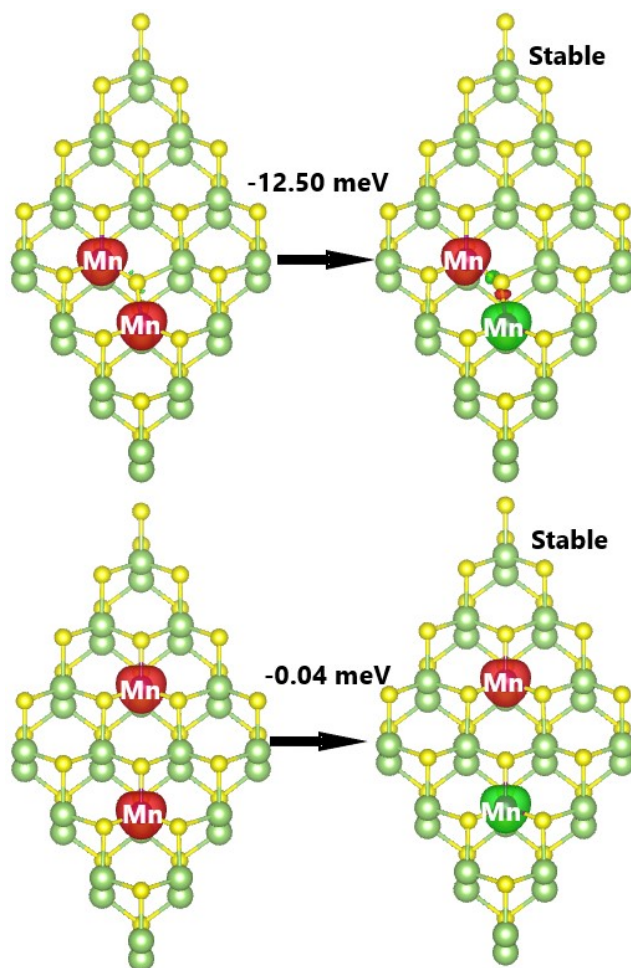

Figure S7: Spin density (Iso-surface value:  $0.01 \text{ e}/\text{\AA}^3$ ; Red surface: Spin-up; Green surface: Spin-down) in GaS monolayer in-plane-doped with Mn atoms with different interatomic distances.

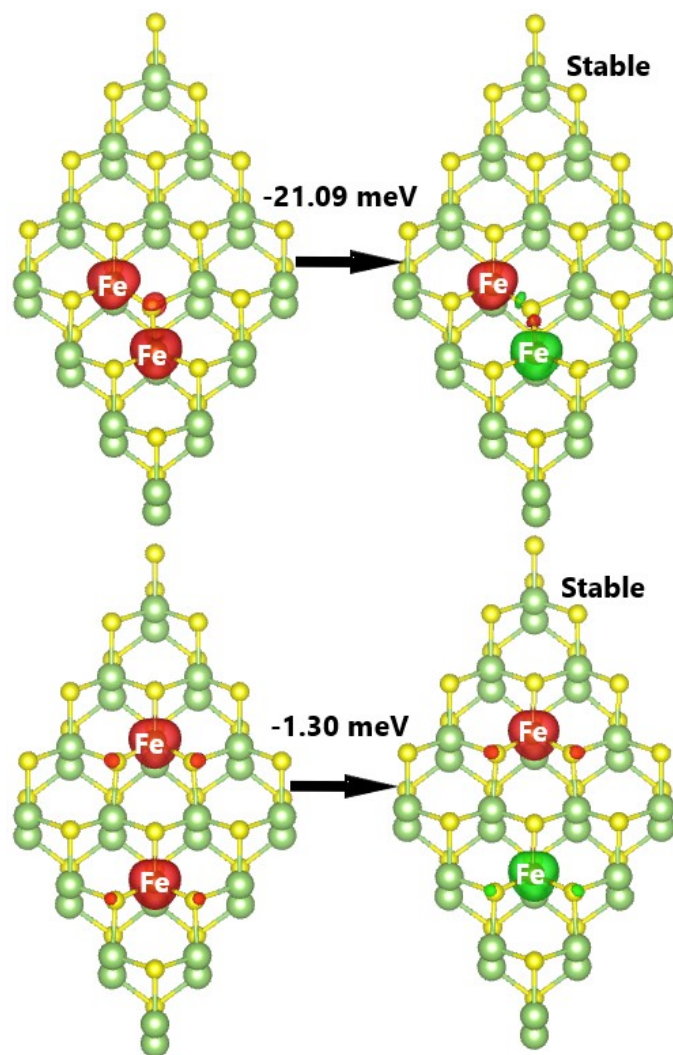

Figure S8: Spin density (Iso-surface value:  $0.01 \text{ e}/\text{\AA}^3$ ; Red surface: Spin-up; Green surface: Spin-down) in GaS monolayer in-plane-doped with Fe atoms with different interatomic distances.
